# Supplementary material
Source: publisher site journal article supplement (https://www.dovepress.com/article/600790)
Supplement: Supplementary file 1 [file 600790%20Revised%20Supplementary%20Materials.docx]

**Supplementary Appendix 1: Consent form and Questionnaire**

**Informed Consent**

Dear Expectant/New Mother:

Greetings! We invite you to participate in the research study titled *Mental Health Services in Preventing Maternal Depression in Western China.* Below is key information to help you decide whether to participate:

1. **Purpose**: This study aims to develop strategies for preventing maternal depression, improve maternal mental health, and provide scientific evidence for integrating mental health services into routine maternal and child healthcare in Western China.
2. **Participation**: If you agree to participate, we will communicate with you or your family to explain the study details and request relevant personal information.
3. **Procedures**: The study involves no invasive measures. All interventions are provided free of charge by the research team. Some questions may cause discomfort, and you can refuse to answer them.
4. **Confidentiality**: Your personal data (e.g., ID number, name, address, phone number, medical history, and study records) will remain confidential. All information will be securely destroyed after the study period, and your privacy will be protected.
5. **Voluntary Participation**: Participation is voluntary. You may withdraw at any time without penalty. The researcher may also terminate your participation if you violate the study protocol, experience study-related harm, or for other justified reasons.
6. **Honesty**: There are no right or wrong answers. Please respond based on your true situation.
7. **Contact**: For questions, contact **Dr. Yuan Huang** at **+86 13312512545**. Thank you for your trust and support!

○**Agree** ○**Disagree**

**Health Survey Questionnaire**

**Name**: ______________ **ID Number**: ________________________
**Participant Phone**: _______________ **Family Contact Phone**: _______________
**Address**: ________Province, ________City/Prefecture, _________County/District

**Administrative Division Codes**:

- Province:
- City/Prefecture:
- County/District:

**Survey Location**: ______________
**Survey Method**:
① Phone ② Home Visit ③ Hospital (County or Above)
④ Primary Healthcare Facility ⑤ Community ⑥ Other: ______________

**Investigator**: __________________ **Date**: ____________________
**Quality Controller**: _____________ **Date**: _____________________

**○ First Trimester (1-12 weeks) ○ Second Trimester (13-27 weeks) ○ Third Trimester (28 weeks to delivery)**

**Part I: Basic Information Survey**

Please read the questions carefully and select based on your current situation.

**1. Basic Information of the Pregnant Woman**

YA1 Age _______ Years

YA2 Height _______ cm

YA3 Weight _______kg

YA4 Marital Status ① Single Skip Spouse′s (Husband′s) Information ② First Marriage ③ Remarried ④ Divorced Skip Spouse′s (Husband′s) Information ⑤ Widowed Skip Spouse′s (Husband′s) Information

YA5 Ethnicity ① Han ② Ethnic Minority (Please Specify) _____________

YA6 Residence ① Urban ② Rural

YA7 Education Level ① Primary School or Below ② Junior High School ③ Senior High School/Vocational School/Technical School ④ College Diploma ⑤ Bachelor′s Degree or Higher

YA8 Occupation ① Civil Servant (Including Military Personnel) ② Enterprise/Institution Administrator ③ Farmer ④ Teacher/Technician ⑤ Medical Worker ⑥ Worker/Service Industry ⑦ Self-Employed ⑧ Unemployed ⑨ Freelancer ⑩ Other (Please Specify) ____________

YA9 Currently Employed ① Yes ② No

YA10 Monthly Household Income (CNY) ① < 1,000 ② 1,000–2,999 ③ 3,000–4,999 ④ 5,000–6,999 ⑤ 7,000–8,999 ⑥ ≥ 9,000

YA11 Type of Medical Insurance (Multiple Selections Allowed) ① Urban Employee Basic Medical Insurance ② Urban and Rural Resident Basic Medical Insurance (Including New Rural Cooperative Medical Scheme) ③ Commercial Insurance ④ No Insurance Proceed to YA12

YA12 Current Living Arrangements ① Spouse (Husband) ② Spouse and His Parents ③ Spouse and My Parents ④ Alone ⑤ Other Relatives/Friends

YA13 Family History of Mental Illness ① Yes ② No ③ Unknown

YA14 Negative Events in the Past Year (Multiple Selections Allowed) ① None

Proceed to YA15 ② Divorce ③ Death of a Family Member ④ Unemployment ⑤ Domestic Violence ⑥ Accident ⑦ Financial Hardship ⑧ Severe Illness ⑨ Legal Dispute ⑩ Theft/Robbery ⑪ Other (Please specify) _____

**2. Spouse′s (Husband′s) Information**

YA15 Age _________ Years

YA16 Ethnicity ① Han ② Ethnic Minority (Please specify) _____ |

YA17 Education Level ① Primary School or Below ② Junior High School ③ Senior High School/Vocational School/Technical School ④ College Diploma ⑤ Bachelor′s Degree or Higher

YA18 Occupation ① Civil Servant (Including Military Personnel) ② Enterprise/Institution Administrator ③ Farmer ④ Teacher/Technician ⑤ Medical Worker ⑥ Worker/Service Industry ⑦ Self-Employed ⑧ Unemployed ⑨ Freelancer ⑩ Other (Please specify) ______________

YA19 Family History of Mental Illness ① Yes ② No ③ Unknown

YA20 Marital Relationship ① Good ② Average ③ Poor

**3. Pregnancy-Related Information**

YA21 Gestational Age ______ Weeks
YA22 Number of Prenatal Checkups ① 1 Time ② 2–4 Times ③ >5 Times (Specify) ______ Times
YA23 Number of Fetuses in Current Pregnancy ______ Fetuses
YA24 Sleep During Pregnancy (Multiple Selections Allowed) **VA24a** Daily Sleep Duration: ________ Hours. ① Normal YA25 ② Staying up Late ③ Difficult to Fall Asleep ④ Frequent Dreams⑤ Frequent Waking ⑥ Frequent nighttime Urination ⑦ Excessive Sleepiness ⑧ Early Waking ⑨ Late Rising
YA25 Exercise During Pregnancy ______ Times Per Week ______ Minutes Per Times
YA26 Meal Frequency During Pregnancy ______ Main Meals Per Day and ______ Snacks Per Day
YA27 Unhealthy Habits (Multiple Selections Allowed) ① None YA28 ② Smoking ③ Alcohol Abuse ④ Sedentary Lifestyle ⑤ Other: ____________

YA28 Pregnancy Symptoms (PUQE Scale)

1 How Long do You Feel Nauseous or Uneasy Each Day? ① Never ② ≤1 Hour ③ 2–3 Hours ④ 4–6 Hours ⑤ >6 Hours
2 How Many Times do You Vomit Daily? ① Never ② 1–2 Times ③ 3–4 Times ④ 5–6 Times ⑤ ≥7 Times
3 How Many Times do You Experience Dry Heaving (No Vomit) Daily? ① Never ② 1–2 Times ③ 3–4 Times ④ 5–6 Times ⑤ ≥7 Times

YA29 Was This Pregnancy Planned? ① Yes ② No
YA30 Satisfaction with Current Physical Health ① Satisfied ② Moderately Satisfied ③ Dissatisfied
YA31 Concern About Financial Burden from Pregnancy or Delivery Costs ① Yes ② No ③ Not Concerned

**4. Fetus-Related Information**

YA32 Anticipation for the Child ① Indifferent ② Moderate ③ Highly Anticipated
YA33 Preference for Child’s Gender ① Male ② Female ③ No Preference
YA34 Family’s Preference for Child’s Gender ① Male ② Female ③ No Preference
YA35 Satisfaction with Fetal Health ① Satisfied ② Moderately Satisfied ③ Dissatisfied |

**5. Previous Pregnancy/Childbirth History**

YA36 Previous Pregnancy Experience ① Yes ② No YA41
YA37 Number of Biological Children ① = 1 ② = 2 ③ ≥3 ④ None
YA38 Last Pregnancy Outcome ① Normal ② High-Risk/Complications ③ Elective Abortion ④ Miscarriage ⑤ Induced Labor
YA39 Previous Childbirth Experience ① Yes ② No
YA40 Last Delivery Experience ① Vaginal Delivery ② Cesarean/Difficult Delivery ③ Stillbirth ④ Birth Defects/Congenital Disease
YA41 History of Infertility ① Yes ② No

**6. Experience with Mental Health and Use of Psychological Services**

YA42 Do you know about depression?

① Yes, I know it well ② I know a little ③ I do not know

YA43 What is your attitude toward depression?

① I am very afraid that I or people around me may develop depression, because depression can seriously affect daily life, and I believe it is difficult to cure.

② Anyone may develop depression, but depression can be prevented and treated.

③ It feels distant from me and the people around me, and has little to do with me.

④ I do not care / It does not matter to me.

YA44 Do you know where depression screening can be obtained? (Multiple answers allowed)

1. I do not know YA45(can only select option②)

② Formal institutions (including psychiatric specialist hospitals, general hospitals, primary healthcare institutions, maternal and child healthcare institutions, psychological counseling clinics established in workplaces/schools, and online or offline formal services provided by private psychological counseling institutions)

③ Individuals / books / internet (informal)

YA45 Have you ever undergone depression screening?

① Yes ② No

YA46 Which methods for treating depression do you know? (Multiple answers allowed)

① Medication treatment

② Physical therapy

③ Individual psychological counseling

④ Group psychological counseling / group-based psychological guidance

⑤ Music therapy

⑥ Exercise therapy

⑦ Mindfulness

⑧ I do not know

YA47 Do you know where treatment for depression can be obtained? (Multiple answers allowed)

① I do not know YA54(can only select option②)

② Formal institutions (including psychiatric specialist hospitals, general hospitals, primary healthcare institutions, maternal and child healthcare institutions, psychological counseling clinics established in workplaces/schools, and online or offline formal services provided by private psychological counseling institutions)

③ Individuals / books / internet (informal)

YA48 If needed, would you seek psychological services?(Multiple answers allowed)

① Yes, I would go to an institution to obtain formal psychological services.

② Yes, I would seek help from friends or family members.

③ Yes, I would look for relevant information myself through books or the internet and would not tell others.

④ No YA54(can only select option②)

⑤ Not sure

YA49 Have you experienced any of the following emotions lasting for more than two weeks?(Multiple answers allowed)

1. No YA54

② Fear / panic ③ Nervousness / worry ④ Low mood / hopelessness

⑤ Irritability / anger ⑥ Other (please specify): __________

YA50 When did it first occur?

Year: __________Month: __________

YA51 Have you ever been diagnosed with any of the following mental health problems?(Multiple answers allowed)

① No YA54

② Depressive disorder ③ Anxiety disorder ④ Bipolar disorder

⑤ Other (please specify): __________

YA52 Severity of the mental health impact

① Mild ② Moderate ③ Severe

YA53 Duration of the impact

① Within 3 months ②Within half a year ③Within 1 year ④More than 1 year

YA54 Have you used formal psychological services provided by institutions?

①Yes ② No YA59

YA55 Which type(s) of formal psychological services have you used? (Multiple answers allowed)

① Medication treatment ②Physical therapy ③Individual psychological counseling

④ Group psychological counseling / group-based psychological guidance

⑤ Music therapy ⑥ Exercise therapy ⑦Mindfulness

YA56 Who provided the psychological services to you?

(Multiple answers allowed)

① Psychiatrist ② Psychological counselor / therapist ③ Medical personnel without psychiatric specialization ④ Community staff ⑤ Other personnel

YA57 In what form did you receive psychological services? (Multiple answers allowed)

① Face-to-face ②Telephone ③ Internet/online ④ Other (please specify): __________

YA58 What was the cost of using psychological services?

Cost per session: __________ yuan; Total number of sessions: __________

YA59 What are your views on the current psychological services? (Multiple answers allowed)

① Very satisfied ② Poor effectiveness ③Too expensive ④Long waiting time before consultation ⑤ Short consultation time ⑥ Poor service attitude ⑦Limited service formats ⑧ Too far away from the place of consultation ⑨ Do not accept this type of service ⑩ Not sure

YA60 Do you think depression treatment should be covered by medical insurance?

① Yes. Depression has a high prevalence and causes great harm to individuals and society.

② No. Depression is merely a matter of personal mindset, and coverage would be a waste of social resources.

③ I do not know.

**7**. **Edinburgh Postnatal Depression Scale (EPDS)**

*Instruction: Please read each statement carefully. For each item, select the one response that best reflects how you have felt during the past 7 days.*

Response options:

Never (0)

Occasionally (1)

Often (2)

Always (3)

YB1. I have been unable to see the funny side of things or laugh happily.____

YB2. I have looked forward to the future without expectation.____

YB3. When things went wrong, I blamed myself unnecessarily and worried.____

YB4. I have felt anxious or worried for no good reason.____

YB5. I have felt scared or panicky for no very good reason.____

YB6. Things have been getting on top of me, making me feel unable to cope.____

YB7. I have been so unhappy that I had difficulty sleeping.____

YB8. I have felt sad and miserable.____

YB9. I have been so unhappy that I cried.____

YB10. The thought of harming myself has occurred to me.____

**8.Multidimensional Scale of Perceived Social Support (MSPSS)**

*Instruction: Please read each item carefully and indicate how you feel about each statement.*

Response options:

Very strongly disagree (1)

Strongly disagree (2)

Mildly disagree (3)

Neutral (4)

Mildly agree (5)

Strongly agree (6)

Very strongly agree (7)

YC1. There is a special person who is around when I am in need.  ____

YC2. There is a special person with whom I can share my joys and sorrows.  ____

YC3. My family really tries to help me.  ____

YC4. I get the emotional help and support I need from my family.  ____

YC5. I have a special person who is a real source of comfort to me. ____

YC6. My friends really try to help me.  ____

YC7. I can count on my friends when things go wrong.  ____

YC8. I can talk about my problems with my family.  ____

YC9. I have friends with whom I can share my joys and sorrows. ____

YC10. There is a special person in my life who cares about my feelings. ____

YC11. My family is willing to help me make decisions. ____

YC12. I can talk about my problems with my friends. ____

**Supplementary Table 1: Firth penalized logistic regression of factors associated with women’s help-seeking intentions for perinatal depression a [*OR* (95%*CI*)†]**

| **Help-Seeking Intention** | **Influence Factors** | **Total** | **Ethnic Groups** | | |
| --- | --- | --- | --- | --- | --- |
| ***Han*** | ***Zhuang*** | **Other** **ethnic minorities** |
| **Seek help for depression if needed** | Postpartum period (Ref: Pregnant period) | 1.528(1.046,2.233) | 1.086(1.038,3.467) | - | - |
| Age >30 years (Ref: ≤ 22 years) | 0.551(0.320,0.946) | - | - | - |
| Farmer (Ref: Unemployed) | - | - | 0.386(0.177,0.844) | - |
| Salaried employee (Ref: Unemployed) | - | - | - | 0.120(0.021,0.679) |
| Monthly household income ≥ 5000 RMB | - | - | - | - |
| Had family history of mental illness | - | - | 0.168(0.037,0.770) | - |
| Strong family support | - | - | 2.397(1.039,5.528) | - |
| Agree that depression is preventable and curable | 1.710(1.129,2.589) | - | - | - |
| Know the facilities available for depression treatments | 1.766(1.093,2.854) | - | - | - |
|  |  |  |  |  |  |
| **Seek help from other people if needed** | Age >30 years (Ref: ≤ 22 years) | - | - | - | - |
| Holding medical insurance | - | - | 8.015(1.216,52.819) | - |
| Monthly household income ≥ 5000 RMB | 1.748(1.275,2.398) | - | 2.025(1.220,3.359) | - |
| Spouse is employed | - | - | 2.267(1.094,4.698) | - |
| Living with spouse, parents, or parents-in-law | - | - | 3.206(1.058,9.711) | - |
| Strong family support | - | - | 2.345(1.060,5.190) | - |
| Negative emotions history | - | - | - | 0.243(0.065,0.912) |
|  |  |  |  |  |  |
| **Seek help from professionals if needed** | High school education or above | - | 2.179(1.058,4.490) | - | - |
| Spouse is employed | - | - | 0.247(0.080,0.767) | - |
| Had family history of mental illness | - | 0.045(0.005,0.383) | - | - |
| Agree that depression is preventable and curable | - | 2.387(1.242,4.585) | - | - |
| Know the facilities available for depression treatments | 1.877(1.246,2.826) | - | 2.313(1.231,4.346) | - |
| Perinatal depression | 0.567(0.335,0.962) | - | - | - |

**Notes:** a Estimates were obtained using Firth penalized logistic regression as a sensitivity analysis to reduce potential sparse-data bias. Models were adjusted using the same covariate specification as in the primary multivariable logistic regression analyses. For brevity, only variables with P < 0.05 are shown. aOR, adjusted odds ratio; †Odds Ratios (95% Confidence Interval)
